# Supplementary material for: Processing Wastewaters from Spanish-Style cv. Chalkidiki Green Olives: A Potential Source of Enterococcus casseliflavus and Hydroxytyrosol
Source: PubMed Central journal article supplement (PMC7564576; doi:10.3390/microorganisms8091274), 2020-08-21

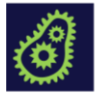

Supplementary materials for the article:

## Processing wastewaters from Spanish-style cv. Chalkidiki green olives: A potential source of *Enterococcus casseliflavus* and hydroxytyrosol

Eugenia Papadaki<sup>1</sup>, George Botsaris<sup>2</sup>, Eleftheria Athanasiadi<sup>1</sup> and Fani Th. Mantzouridou<sup>1,\*</sup>

<sup>1</sup> Laboratory of Food Chemistry and Technology, Department of Chemistry, Aristotle University of Thessaloniki, 54124 Thessaloniki, Greece; epapadaki@chem.auth.gr (E.P.); aeleftther@chem.auth.gr (E.A.)

<sup>2</sup> Department of Agricultural Sciences, Biotechnology and Food Science, Cyprus University of Technology, 50329 Limassol, Cyprus; george.botsaris@cut.ac.cy

\* Correspondence: fmantz@chem.auth.gr; Tel.: +30 2310 997774

**This document contains supplementary materials:**

**Table S1:** Levels of factors in actual and coded values used in the experimental design.

**Figure S1:** Changes in the pH value during the spontaneous fermentation of Spanish-style green olive processing wastewaters with an initial pH value of 3.5, 5.0 or 11.5 at 15 °C (A), 30 °C (B), 50 °C (C), and room temperature (D).

**Figure S2:** RP-HPLC phenolic profiles at 280 nm of Spanish-style green olive processing wastewaters prior (0 d) and after incubation without (control) or with the *Enterococcus casseliflavus* isolate at 37 °C for 7 d under static conditions.

**Figure S3:** RP-HPLC phenolic profiles at 280 nm of a substrate containing a diluted polar extract of the olive fruit with 806.7 mg/L initial oleuropein concentration and bacterial growth factors prior (0 d) and after incubation with the *Enterococcus casseliflavus* isolate at 37 °C for 3 d under static conditions.

**Table S1.** Levels of factors in actual and coded values used in the experimental design.

| Factor               | Variable | Levels                    |     |      |      |           |
|----------------------|----------|---------------------------|-----|------|------|-----------|
|                      |          | Coded values <sup>1</sup> |     |      |      |           |
|                      |          | $-\alpha$                 | -1  | 0    | +1   | $+\alpha$ |
| Initial pH value     | $X_1$    | 3.1                       | 5.0 | 7.8  | 10.5 | 12.4      |
| NaCl content (% w/v) | $X_2$    | 1.6                       | 5.0 | 10.0 | 15.0 | 18.4      |
| Temperature (°C)     | $X_3$    | 13                        | 20  | 30   | 40   | 47        |

<sup>1</sup>  $Coded\ value = \frac{actual\ level - (high\ level + low\ level)/2}{(high\ level - low\ level)/2}$ , where  $a = 2^{n/4}$ ,  $n$  = the number of variables and -1, 0, +1 correspond to the low-, mid- and high-level of  $X_i$ , respectively.

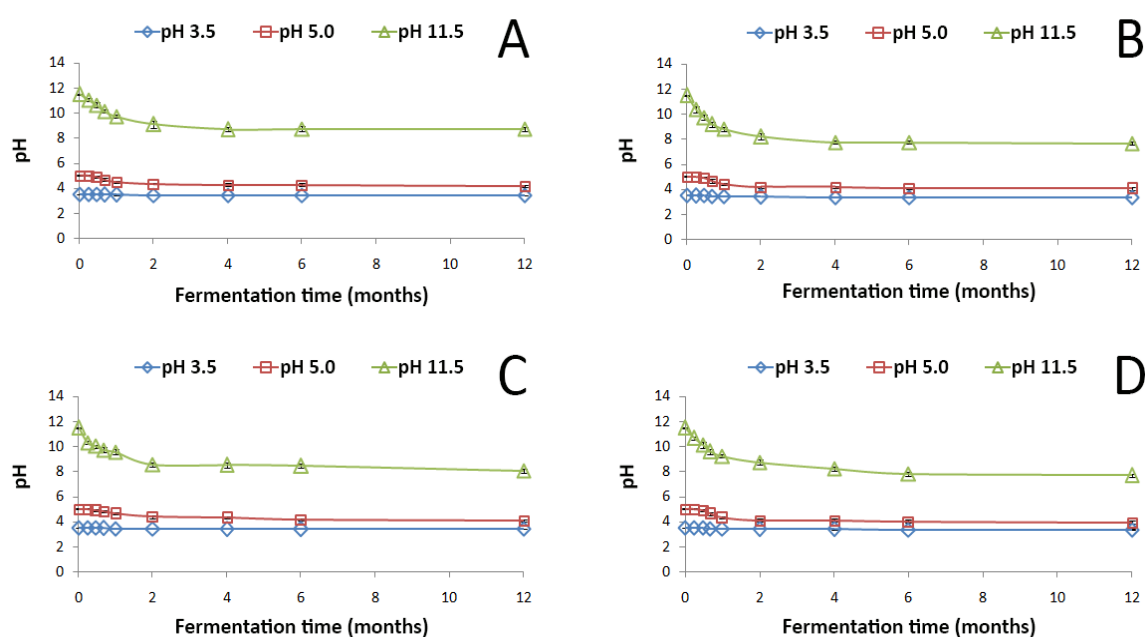

**Figure S1.** Changes in the pH value during the spontaneous fermentation of Spanish-style green olive processing wastewaters with an initial pH value of 3.5, 5.0 or 11.5 at 15 °C (A), 30 °C (B), 50 °C (C), and room temperature (D). Data points are mean values of 5 independent experiments  $\times$  3 measurements ( $n = 15$ ) and error bars represent the standard deviation of the mean value.

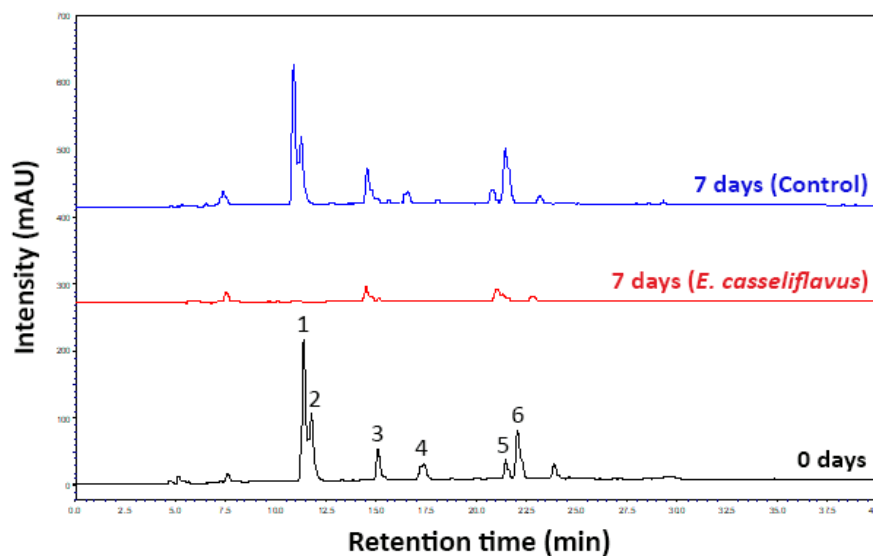

**Figure S2.** RP-HPLC phenolic profiles at 280 nm of Spanish-style green olive processing wastewaters prior (0 d) and after incubation without (control) or with the *Enterococcus casseliflavus* isolate at 37 °C for 7 d under static conditions. Peaks: (1) Hydroxytyrosol, (2) Methoxy derivative of hydroxytyrosol, (3) Tyrosol, (4) Caffeic acid, (5) Luteolin-7-*O*-glucoside, (6) *p*-Coumaric acid.

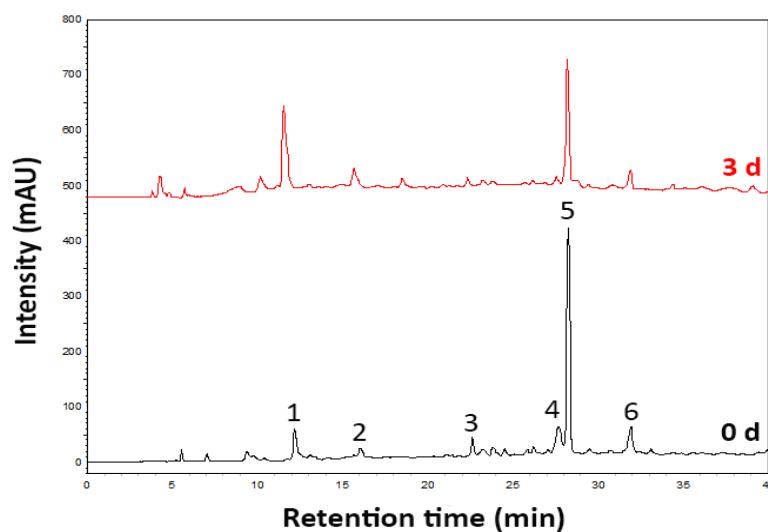

**Figure S3.** RP-HPLC phenolic profiles at 280 nm of a substrate containing a diluted polar extract of the olive fruit with 806.7 mg/L initial oleuropein concentration and bacterial growth factors prior (0 d) and after incubation with the *Enterococcus casseliflavus* isolate at 37 °C for 3 d under static conditions. Peaks: (1) Hydroxytyrosol, (2) Tyrosol, (3) Luteolin-7-*O*-glucoside, (4) Decarboxymethyl oleuropein aglycon, (5) Oleuropein, (6) Luteolin.

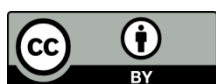

Supplement: microorganisms-08-01274-s001.pdf [file microorganisms-08-01274-s001.pdf]
